# Supplementary material
Source: ML conference proceedings conference paper supplement (https://openreview.net/forum?id=tMg5hKRiW-2)
Supplement: supplementary_material [file attachment]

# RED-GCN: REVISIT THE DEPTH OF GRAPH CONVOLUTIONAL NETWORK

Anonymous authors

Paper under double-blind review

## A APPENDIX

### The statistics of datasets.

Table 1: The statistics of datasets.

| Datasets  | Cora   | Citeseer | Pubmed | DBLP    | Texas | Wisconsin | Cornell | Actor  | Chameleon | Squirrel | cornell5 |
|-----------|--------|----------|--------|---------|-------|-----------|---------|--------|-----------|----------|----------|
| #Nodes    | 2,708  | 3,327    | 19,717 | 17,716  | 183   | 251       | 183     | 7,600  | 2,277     | 5,201    | 18,660   |
| #Edges    | 10,556 | 9,104    | 88,648 | 105,734 | 325   | 515       | 298     | 30,019 | 62,792    | 396,846  | 158,1554 |
| #Features | 1,433  | 3,703    | 500    | 1,639   | 1,703 | 1,703     | 1,703   | 932    | 2,325     | 2,089    | 4,735    |
| #Classes  | 7      | 6        | 3      | 4       | 5     | 5         | 5       | 5      | 5         | 5        | 5        |

**Implementation details.** For all methods, we set the learning rate to 0.01, the decaying weight for the learning rate to  $5e^{-4}$ , the number of training epochs to 500. The  $K$  largest/smallest eigenvalues for RED-GCN-D is  $\max\{1000, 0.1n\}$ , where  $n$  is the number of nodes in the input graph. For all baselines, the parameters are set according to their original papers. All experiments are run on a Tesla-V100 GPU.

**Graph augmentation and geometric insights.** The observations and analyses for the following Figure 1 and Figure 2 are same with those in subsection 4.4.

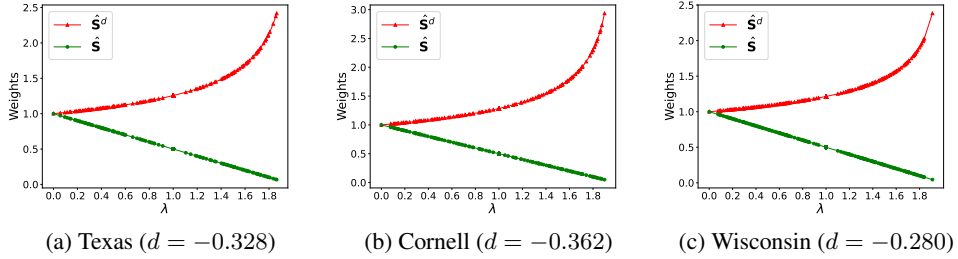

Figure 1: The weights of eigengraphs w.r.t. eigenvalues on the augmented diffusion matrix  $\hat{S}^d$  and original  $\hat{S}$ .

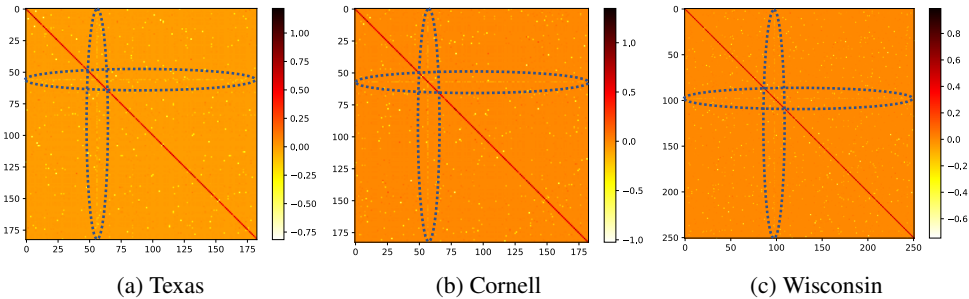

Figure 2: The difference between the augmented diffusion matrix and the original one  $\hat{S}^d - \hat{S}$ .

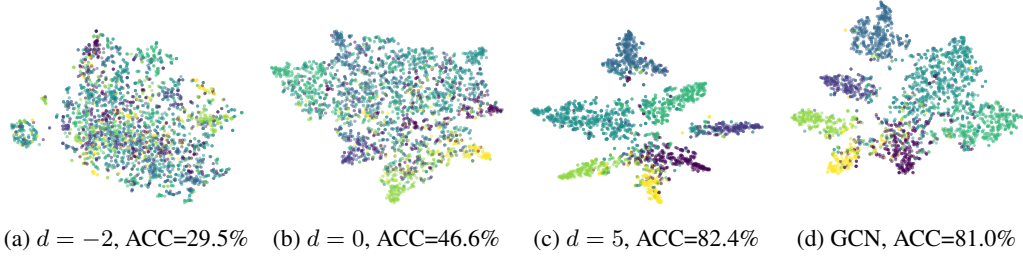

Figure 3: Visualization of node embeddings by t-SNE on Cora (homophilic)

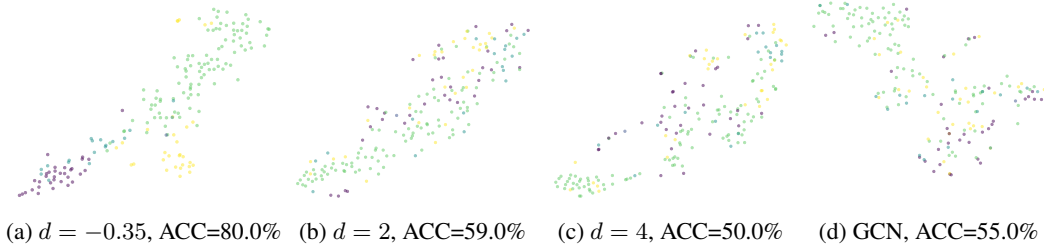

Figure 4: Visualization of node embeddings by t-SNE on Texas (heterophilic).

We conduct a visualization of node embedding generated by RED-GCN under different depths for homophilic (Cora) and heterophilic (Texas) graphs. As shown in Figure 3, for Cora, when  $d = 5$ , the nodes in different classes form clearly distinguishable clusters (ACC=82.4%). When the depth decreases from a positive value  $d = 5$  (ACC=82.4%) to a negative value  $d = -2$  (ACC=29.5%), the nodes belonged to different classes/colors mix with each other, and the clearly clustered structure does not exist anymore. However, for Texas shown in Figure 4, when decreasing the depth from  $d = 4$  (ACC=50%) to  $d = -0.35$  (ACC=80%), the clusters of different classes/colors become well-separated. Especially, the purple nodes spread randomly all over the embedding space when  $d = 4$  but concentrate in one cluster when  $d = -0.35$ . The spatial distribution of the node embeddings reveals that ReD-GCN with positive and negative depths respectively models graph homophily and heterophily in a proper way.
